# Supplementary material
Source: PubMed Central journal article supplement (PMC2393765)
Supplement: pnas_0709398105_5.pdf [file pnas_0709398105_5.pdf]

**Table 1.** Analysis sheet for the transgenic enhancer assay

| Locus | Embryonic day | Number of embryos assessed | LacZ positive/genotyping PCR positive |
|-------|---------------|----------------------------|---------------------------------------|
| AS071 | 10.5          | 243                        | 30/50                                 |
|       | 11.5          | 55                         | 8/18                                  |
|       | 13.5          | 36                         | 8/17                                  |
| AS021 | 10.5          | 33                         | 0/14                                  |
|       | 11.5          | 17                         | 2/10                                  |
|       | 12.5          | 61                         | 7/16                                  |
|       | 13.5          | 66                         | 13/23                                 |
