# Supplementary material
Source: PubMed Central journal article supplement (PMC2393765)
Supplement: pnas_0709398105_6.pdf [file pnas_0709398105_6.pdf]

**Table 2. Ten genes in the 2-Mb region around the AS021 locus**

| Gene              | Gene name                                              | Gene ontology                                                                                                                                                                                                                                                                                                             |
|-------------------|--------------------------------------------------------|---------------------------------------------------------------------------------------------------------------------------------------------------------------------------------------------------------------------------------------------------------------------------------------------------------------------------|
| Hsfy2             | Heat shock transcription factor, Y linked 2            | molecular function DNA binding IEA GO:0003677 MGI na//cellular component nucleus IEA GO:0005634 MGI na//biological process protein folding IEA GO:0006457 MGI na//biological process response to unfolded protein IEA GO:0006986 MGI na                                                                                   |
| SATB2             | SATB family member 2                                   | molecular function DNA binding IEA GO:0003677 MGI na//biological process development IEA GO:0007275 MGI na//cellular component nucleus IEA GO:0005634 MGI na//biological process regulation of transcription, DNA-dependent IEA GO:0006355 MGI na//molecular function transcription factor activity IEA GO:0003700 MGI na |
| 1110034B0<br>5Rik |                                                        | Unknown                                                                                                                                                                                                                                                                                                                   |
| 2810022L0<br>2Rik |                                                        | Unknown                                                                                                                                                                                                                                                                                                                   |
| KCTD18            | Potassium channel tetramerisation domain containing 18 | molecular function DNA binding IEA GO:0003677 MGI na//cellular component nucleus IEA GO:0005634 MGI na                                                                                                                                                                                                                    |

Table 2. Continued

| Gene   | Gene name                            | Gene ontology                                                                                                                                                                                                                                                                                                                                                                                                                                                  |
|--------|--------------------------------------|----------------------------------------------------------------------------------------------------------------------------------------------------------------------------------------------------------------------------------------------------------------------------------------------------------------------------------------------------------------------------------------------------------------------------------------------------------------|
| SGOL2  | Shugoshin-like 2 ( <i>S. pombe</i> ) | molecular function DNA binding IEA GO:0003677 MGI na//cellular component nucleus IEA GO:0005634 MGI na                                                                                                                                                                                                                                                                                                                                                         |
| AOX1   | Aldehyde oxidase 1                   | molecular function aldehyde oxidase activity IDA GO:0004031 MGI 518535//biological process electron transport IEA GO:0006118 MGI na//molecular function electron transporter activity IEA GO:0005489 MGI na//molecular function iron ion binding IEA GO:0005506 MGI na//molecular function molybdenum ion binding IEA GO:0030151 MGI na//molecular function oxidoreductase activity IEA GO:0016491 MGI n                                                       |
| AOX3   | Aldehyde oxidase 3                   | molecular function aldehyde oxidase activity IDA GO:0004031 MGI 11562361//molecular function electron carrier activity IDA GO:0009055 MGI 11562361,1246851//molecular function electron carrier activity ISS GO:0009055 MGI 11562361,1246851//biological process electron transport ISS GO:0006118 MGI 12466851//molecular function molybdenum ion binding IDA GO:0030151 MGI 11562361//molecular function oxidoreductase activity ISS GO:0016491 MGI 12466851 |
| AOX4   | Aldehyde oxidase 4                   | molecular function aldehyde oxidase activity ISS GO:0004031 MGI 11562361//molecular function electron carrier activity ISS GO:0009055 MGI 11562361,1246851//biological process electron transport ISS GO:0006118 MGI 12466851//molecular function electron transporter activity ISS GO:0005489 MGI 11562361//molecular function molybdenum ion binding ISS GO:0030151 MGI 11562361//molecular function oxidoreductase activity ISS GO:0016491 MGI 12466851     |
| Aox3l1 | Aldehyde oxidase 3-like 1            | molecular function oxidoreductase activity IEA GO:0016491 MGI na                                                                                                                                                                                                                                                                                                                                                                                               |
