# Supplementary material
Source: PubMed Central journal article supplement (PMC2393765)

a

chr19:45,619,425-45,622,626 (mouse Feb 2006 mm8 assembly)

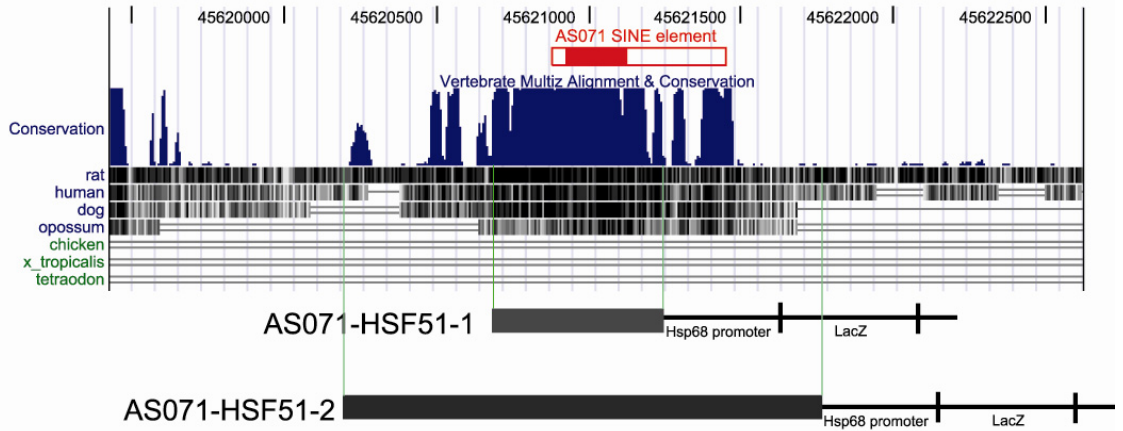

b

chr1:57,273,436-57,276,555 (mouse Feb 2006 mm8 assembly)

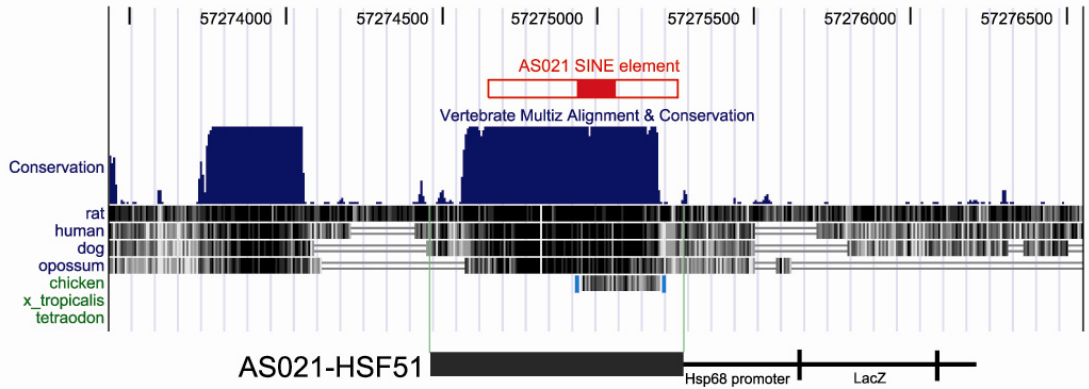

Supplement: pnas_0709398105_1.pdf [file pnas_0709398105_1.pdf]

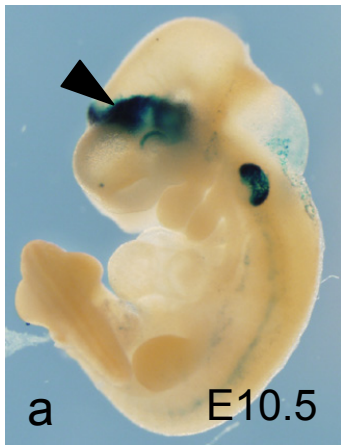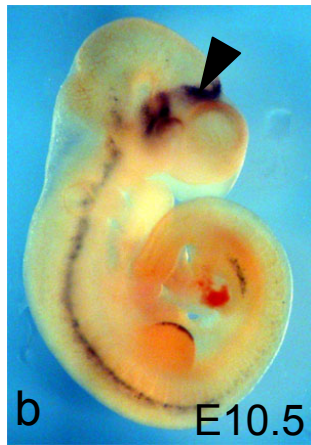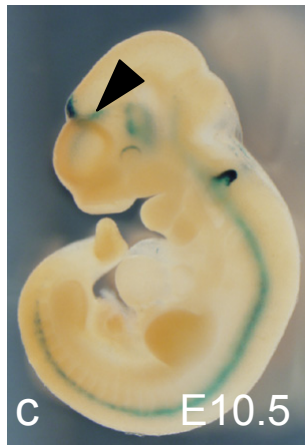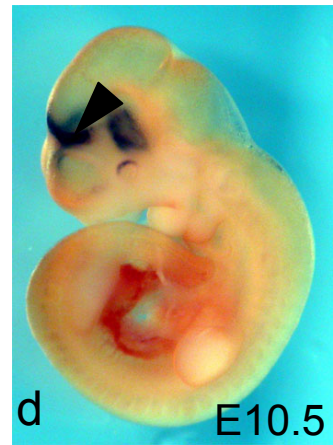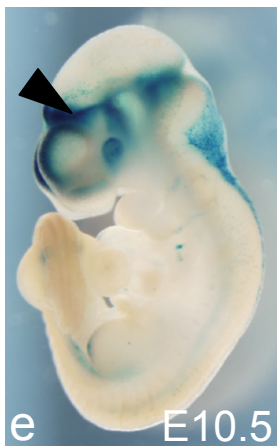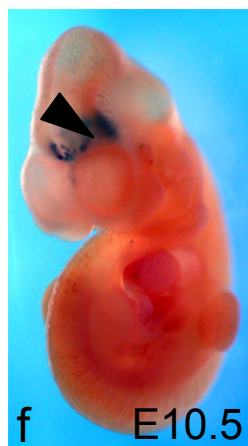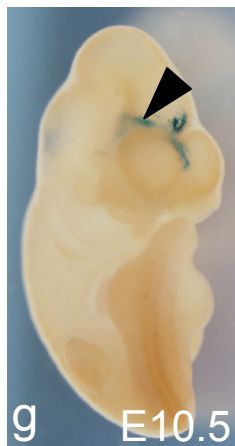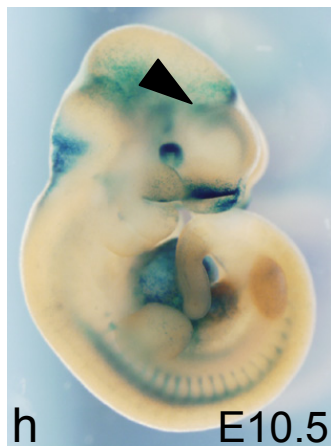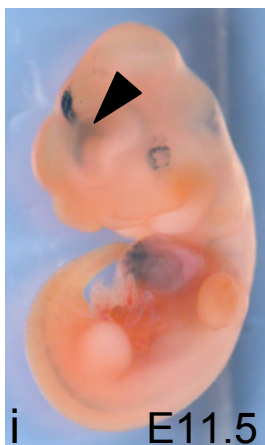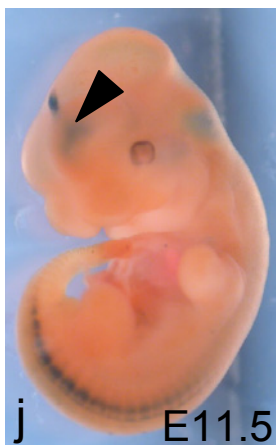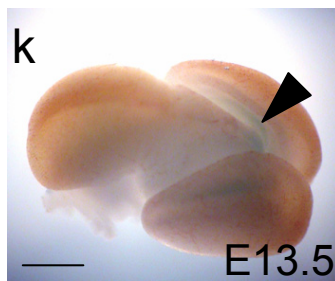

Supplement: pnas_0709398105_2.pdf [file pnas_0709398105_2.pdf]

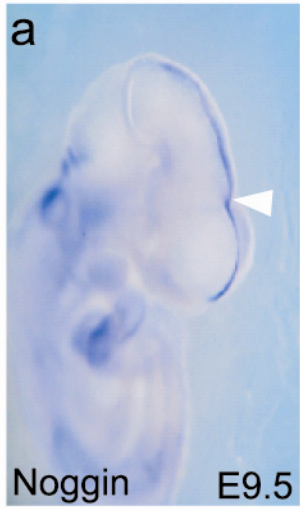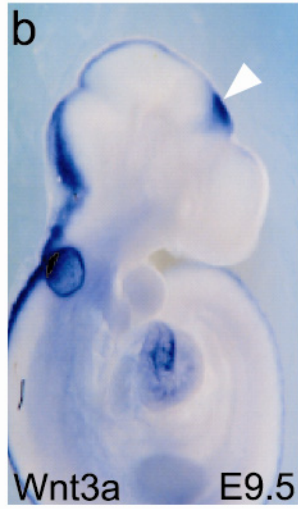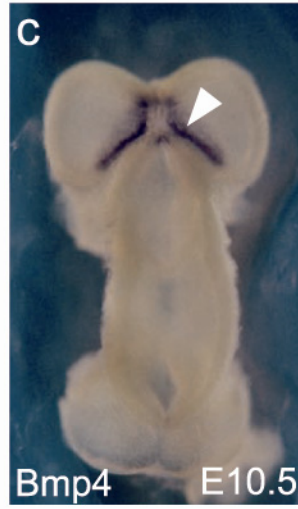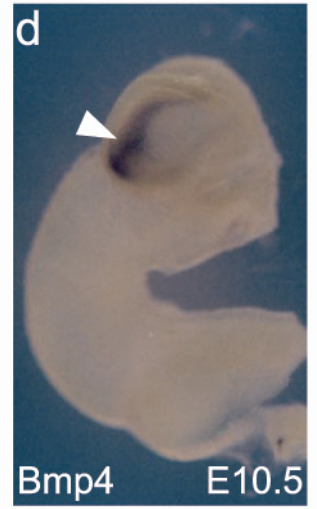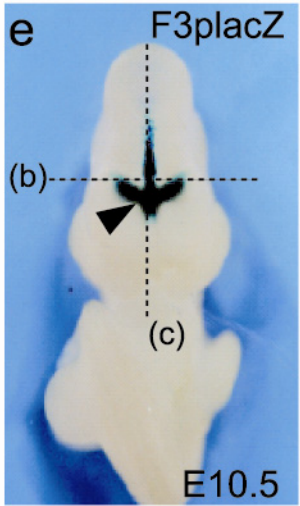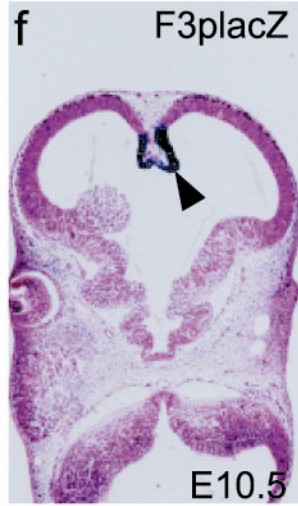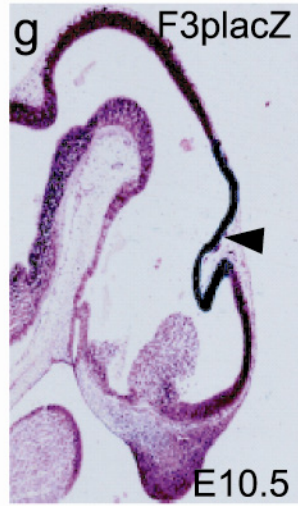

Supplement: pnas_0709398105_3.pdf [file pnas_0709398105_3.pdf]

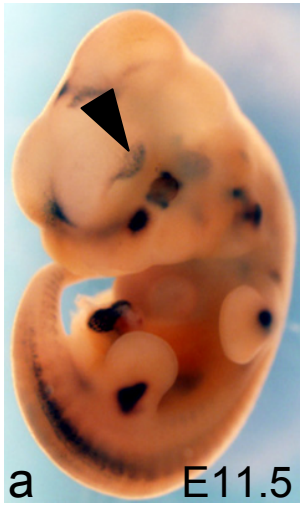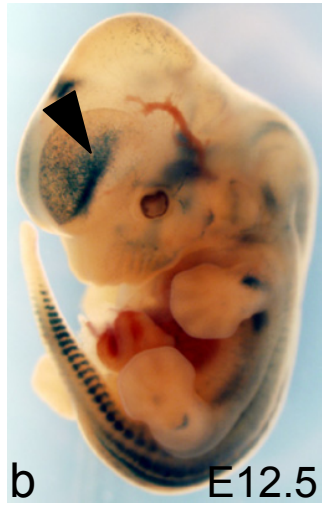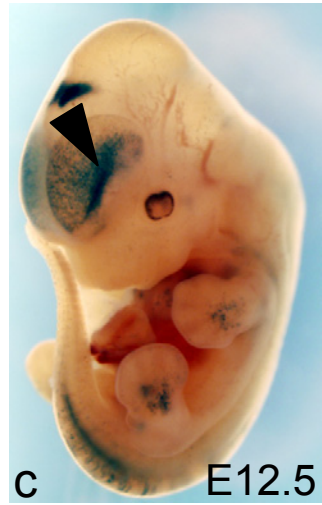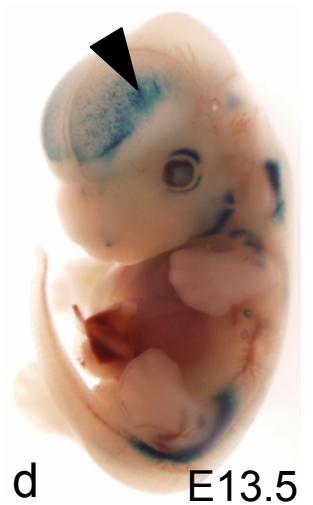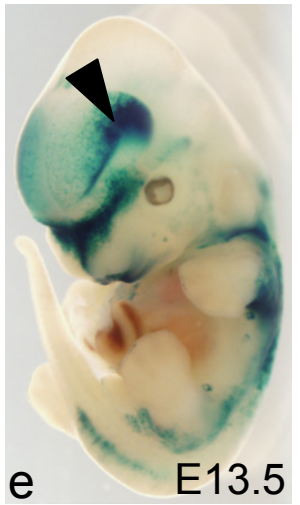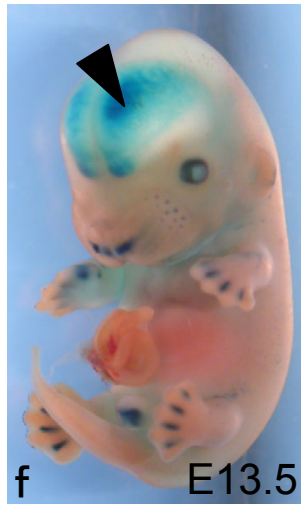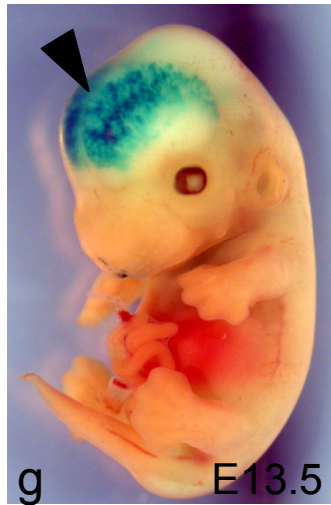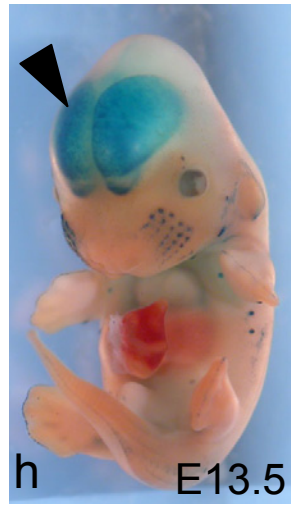

Supplement: pnas_0709398105_4.pdf [file pnas_0709398105_4.pdf]
